# Supplementary material
Source: publisher site journal article supplement (https://www.dovepress.com/article/465098)
Supplement: Supplementary file 1 [file get_supplementary_file.php]

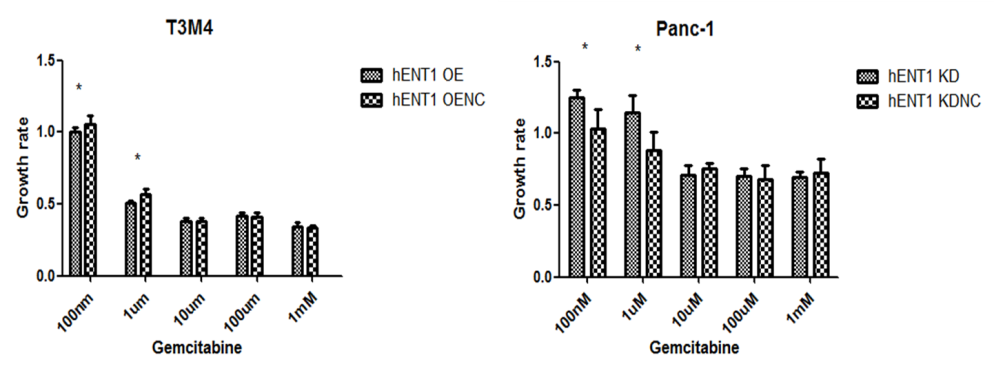


**Supplementary Figure 1** The regulatory effect of hENT1 on the chemosensitivity of pancreatic cancer cells to Gemcitabine.

**Supplementary Table 1: Relationship between hENT1 expression and clinical characteristics**

| **Characteristics** | **Patients** | | **hENT1 expression** | |  |
| --- | --- | --- | --- | --- | --- |
| n | % | High | Low | P value |
| **All patients** | 359 | 100 | 165 | 194 | - |
| **Sex** | | | | | 0.165 |
| **Male**  **Female** | 204  155 | 56.8  43.2 | 87  78 | 117  77 |  |
| **Age** | | | | | 0.432 |
| **<65**  **≥65** | 239  120 | 66.6  33.4 | 106  59 | 133  61 |  |
| **Diabetes** | | | | | 0.758 |
| **Yes**  **No** | 48  308 | 13.4  85.8 | 21  144 | 27  164 |  |
| **Chronic pancreatitis** | | | | | 1 |
| **Yes**  **No** | 1  358 | 0.3  99.7 | 0  165 | 1  193 |  |
| **CA19-9, U/ml** | | | | | 1 |
| **>467**  **<467** | 73  228 | 24.3  75.7 | 34  108 | 39  120 |  |
| **Pathological differentiation degree** | | | | | 0.032 |
| **High**  **Low** | 116  243 | 32.3  67.7 | 63  102 | 53  141 |  |
| **Capsular invasion** | | | | | 0.458 |
| **Yes**  **No** | 342  17 | 95.3  4.7 | 159  6 | 183  11 |  |
| **Vascular invasion** | | | | | 0.167 |
| **Yes**  **No** | 28  331 | 7.8  92.2 | 9  156 | 19  175 |  |
| **Neural infiltration** | | | | | 0.525 |
| **Yes**  **No** | 165  194 | 46.0  54.0 | 79  86 | 86  108 |  |
| **T classification** | | | | | 0.653 |
| **T1/2**  **T3/4** | 21  338 | 5.8  94.2 | 11  154 | 10  184 |  |
| **N classification** | | | | | 0.336 |
| **N0**  **N1/2** | 153  206 | 42.6  57.4 | 75  90 | 78  116 |  |
| **M classification** | | | | | 1 |
| **M0**  **M1** | 336  23 | 93.6  6.4 | 154  11 | 182  12 |  |
| **TNM stage** | | | | | 0.574 |
| **I/II**  **III/IV** | 328  31 | 91.4  8.6 | 149  16 | 179  15 |  |

**Supplementary Table 2: The univariate analysis of overall survival from the general population of patients and Gemcitabine-treated patients (N=299)**

| Characteristics | **OS (overall survival)**  **General population Gemcitabine-treated patients** | | | | | |
| --- | --- | --- | --- | --- | --- | --- |
|  | **Hazard ratio (HR)** | **95% CI**  **(confidence**  **interval)** | **P value** | **Hazard**  **Ratio**  **(HR)** | **95% CI**  **(confidence**  **Interval)** | **P value** |
| M classification | 0.65 | 0.22-1.91 | 0.433 | 1.03 | 0.32-3.36 | 0.963 |
|  |  |  |  |  |  |  |
| TNM stage | 2.68 | 1.09-6.58 | 0.031 | 2.90 | 1.06-7.92 | 0.038 |
|  |  |  |  |  |  |  |
| Capsular invasion | 0.84 | 0.37-1.92 | 0.682 | 0.87 | 0.38-1.98 | 0.734 |
|  |  |  |  |  |  |  |
| CA19-9 | 1.19 | 0.85-1.67 | 0.309 | 1.16 | 0.82-1.65 | 0.395 |
|  |  |  |  |  |  |  |
| hENT1 | 0.60 | 0.43-0.82 | 0.001 | 0.60 | 0.43-0.82 | 0.002 |
|  |  |  |  |  |  |  |

**Supplementary Table 3: The univariate analysis of disease-free survival from the general population of patients and Gemcitabine-treated patients (N=298)**

| Characteristics | **DFS (disease-free survival)**  General population Gemcitabine-treated patients | | | | | |
| --- | --- | --- | --- | --- | --- | --- |
|  | **Hazard ratio (HR)** | **95% CI**  **(confidence**  **interval)** | **P value** | **Hazard**  **Ratio**  **(HR)** | **95% CI**  **(confidence**  **Interval)** | **P value** |
| M classification | 0.91 | 0.32-2.64 | 0.867 | 0.98 | 0.30-3.19 | 0.976 |
|  |  |  |  |  |  |  |
| TNM stage | 1.88 | 0.77-4.59 | 0.169 | 2.31 | 0.85-6.28 | 0.100 |
|  |  |  |  |  |  |  |
| Capsular invasion | 0.74 | 0.34-1.59 | 0.440 | 0.76 | 0.35-1.64 | 0.485 |
|  |  |  |  |  |  |  |
| CA19-9 | 1.36 | 0.99-1.86 | 0.057 | 1.32 | 0.95-1.83 | 0.097 |
|  |  |  |  |  |  |  |
| hENT1 | 0.53 | 0.39-0.72 | ＜0.001 | 0.56 | 0.41-0.77 | ＜0.001 |
